# Supplementary material for: Quality of Life Differences for Primary Immunodeficiency Patients on Home SCIG versus IVIG
Source: PubMed Central journal article supplement (PMC6863943; doi:10.1007/s10875-019-00705-5), 2019-11-01
Supplement: 10875_2019_705_MOESM1_ESM.pdf [file 10875_2019_705_MOESM1_ESM.pdf]

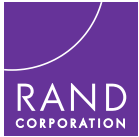

# 36-Item Short Form Survey Instrument (SF-36)

## RAND 36-Item Health Survey 1.0 Questionnaire Items

Choose one option for each questionnaire item.

1. In general, would you say your health is:

- 1 - Excellent
  - 2 - Very good
  - 3 - Good
  - 4 - Fair
  - 5 - Poor
- 

2. **Compared to one year ago**, how would you rate your health in general **now**?

- 1 - Much better now than one year ago
  - 2 - Somewhat better now than one year ago
  - 3 - About the same
  - 4 - Somewhat worse now than one year ago
  - 5 - Much worse now than one year ago
-

The following items are about activities you might do during a typical day. Does **your health now limit you** in these activities? If so, how much?

|                                                                                                            | Yes,<br>limited a<br>lot | Yes,<br>limited a<br>little | No, not<br>limited at all |
|------------------------------------------------------------------------------------------------------------|--------------------------|-----------------------------|---------------------------|
| 3. <b>Vigorous activities</b> , such as running, lifting heavy objects, participating in strenuous sports  | <input type="radio"/> 1  | <input type="radio"/> 2     | <input type="radio"/> 3   |
| 4. <b>Moderate activities</b> , such as moving a table, pushing a vacuum cleaner, bowling, or playing golf | <input type="radio"/> 1  | <input type="radio"/> 2     | <input type="radio"/> 3   |
| 5. Lifting or carrying groceries                                                                           | <input type="radio"/> 1  | <input type="radio"/> 2     | <input type="radio"/> 3   |
| 6. Climbing <b>several</b> flights of stairs                                                               | <input type="radio"/> 1  | <input type="radio"/> 2     | <input type="radio"/> 3   |
| 7. Climbing <b>one</b> flight of stairs                                                                    | <input type="radio"/> 1  | <input type="radio"/> 2     | <input type="radio"/> 3   |
| 8. Bending, kneeling, or stooping                                                                          | <input type="radio"/> 1  | <input type="radio"/> 2     | <input type="radio"/> 3   |
| 9. Walking <b>more than a mile</b>                                                                         | <input type="radio"/> 1  | <input type="radio"/> 2     | <input type="radio"/> 3   |
| 10. Walking <b>several blocks</b>                                                                          | <input type="radio"/> 1  | <input type="radio"/> 2     | <input type="radio"/> 3   |
| 11. Walking <b>one block</b>                                                                               | <input type="radio"/> 1  | <input type="radio"/> 2     | <input type="radio"/> 3   |
| 12. Bathing or dressing yourself                                                                           | <input type="radio"/> 1  | <input type="radio"/> 2     | <input type="radio"/> 3   |

During the **past 4 weeks**, have you had any of the following problems with your work or other regular daily activities **as a result of your physical health**?

|                                                                                                       | Yes                     | No                      |
|-------------------------------------------------------------------------------------------------------|-------------------------|-------------------------|
| 13. Cut down the <b>amount of time</b> you spent on work or other activities                          | <input type="radio"/> 1 | <input type="radio"/> 2 |
| 14. <b>Accomplished less</b> than you would like                                                      | <input type="radio"/> 1 | <input type="radio"/> 2 |
| 15. Were limited in the <b>kind</b> of work or other activities                                       | <input type="radio"/> 1 | <input type="radio"/> 2 |
| 16. Had <b>difficulty</b> performing the work or other activities (for example, it took extra effort) | <input type="radio"/> 1 | <input type="radio"/> 2 |

During the **past 4 weeks**, have you had any of the following problems with your work or other regular daily activities **as a result of any emotional problems** (such as feeling depressed or anxious)?

- |                                                                              | Yes                     | No                      |
|------------------------------------------------------------------------------|-------------------------|-------------------------|
| 17. Cut down the <b>amount of time</b> you spent on work or other activities | <input type="radio"/> 1 | <input type="radio"/> 2 |
| 18. <b>Accomplished less</b> than you would like                             | <input type="radio"/> 1 | <input type="radio"/> 2 |
| 19. Didn't do work or other activities as <b>carefully</b> as usual          | <input type="radio"/> 1 | <input type="radio"/> 2 |
- 

20. During the **past 4 weeks**, to what extent has your physical health or emotional problems interfered with your normal social activities with family, friends, neighbors, or groups?

- 1 - Not at all
  - 2 - Slightly
  - 3 - Moderately
  - 4 - Quite a bit
  - 5 - Extremely
- 

21. How much **bodily** pain have you had during the **past 4 weeks**?

- 1 - None
  - 2 - Very mild
  - 3 - Mild
  - 4 - Moderate
  - 5 - Severe
  - 6 - Very severe
-

22. During the **past 4 weeks**, how much did **pain** interfere with your normal work (including both work outside the home and housework)?

- 1 - Not at all
- 2 - A little bit
- 3 - Moderately
- 4 - Quite a bit
- 5 - Extremely

These questions are about how you feel and how things have been with you **during the past 4 weeks**. For each question, please give the one answer that comes closest to the way you have been feeling.

How much of the time during the **past 4 weeks**...

|                                                                         | All of<br>the<br>time   | Most<br>of the<br>time  | A good bit<br>of the<br>time | Some<br>of the<br>time  | A little<br>of the<br>time | None<br>of the<br>time  |
|-------------------------------------------------------------------------|-------------------------|-------------------------|------------------------------|-------------------------|----------------------------|-------------------------|
| 23. Did you feel full of pep?                                           | <input type="radio"/> 1 | <input type="radio"/> 2 | <input type="radio"/> 3      | <input type="radio"/> 4 | <input type="radio"/> 5    | <input type="radio"/> 6 |
| 24. Have you been a very nervous person?                                | <input type="radio"/> 1 | <input type="radio"/> 2 | <input type="radio"/> 3      | <input type="radio"/> 4 | <input type="radio"/> 5    | <input type="radio"/> 6 |
| 25. Have you felt so down in the dumps that nothing could cheer you up? | <input type="radio"/> 1 | <input type="radio"/> 2 | <input type="radio"/> 3      | <input type="radio"/> 4 | <input type="radio"/> 5    | <input type="radio"/> 6 |
| 26. Have you felt calm and peaceful?                                    | <input type="radio"/> 1 | <input type="radio"/> 2 | <input type="radio"/> 3      | <input type="radio"/> 4 | <input type="radio"/> 5    | <input type="radio"/> 6 |
| 27. Did you have a lot of energy?                                       | <input type="radio"/> 1 | <input type="radio"/> 2 | <input type="radio"/> 3      | <input type="radio"/> 4 | <input type="radio"/> 5    | <input type="radio"/> 6 |
| 28. Have you felt downhearted and blue?                                 | <input type="radio"/> 1 | <input type="radio"/> 2 | <input type="radio"/> 3      | <input type="radio"/> 4 | <input type="radio"/> 5    | <input type="radio"/> 6 |
| 29. Did you feel worn out?                                              | <input type="radio"/> 1 | <input type="radio"/> 2 | <input type="radio"/> 3      | <input type="radio"/> 4 | <input type="radio"/> 5    | <input type="radio"/> 6 |
| 30. Have you been a happy person?                                       | <input type="radio"/> 1 | <input type="radio"/> 2 | <input type="radio"/> 3      | <input type="radio"/> 4 | <input type="radio"/> 5    | <input type="radio"/> 6 |
| 31. Did you feel tired?                                                 | <input type="radio"/> 1 | <input type="radio"/> 2 | <input type="radio"/> 3      | <input type="radio"/> 4 | <input type="radio"/> 5    | <input type="radio"/> 6 |

32. During the **past 4 weeks**, how much of the time has **your physical health or emotional problems** interfered with your social activities (like visiting with friends, relatives, etc.)?

- 1 - All of the time
- 2 - Most of the time
- 3 - Some of the time
- 4 - A little of the time
- 5 - None of the time
- 

How TRUE or FALSE is **each** of the following statements for you.

|                                                          | Definitely true         | Mostly true             | Don't know              | Mostly false            | Definitely false        |
|----------------------------------------------------------|-------------------------|-------------------------|-------------------------|-------------------------|-------------------------|
| 33. I seem to get sick a little easier than other people | <input type="radio"/> 1 | <input type="radio"/> 2 | <input type="radio"/> 3 | <input type="radio"/> 4 | <input type="radio"/> 5 |
| 34. I am as healthy as anybody I know                    | <input type="radio"/> 1 | <input type="radio"/> 2 | <input type="radio"/> 3 | <input type="radio"/> 4 | <input type="radio"/> 5 |
| 35. I expect my health to get worse                      | <input type="radio"/> 1 | <input type="radio"/> 2 | <input type="radio"/> 3 | <input type="radio"/> 4 | <input type="radio"/> 5 |
| 36. My health is excellent                               | <input type="radio"/> 1 | <input type="radio"/> 2 | <input type="radio"/> 3 | <input type="radio"/> 4 | <input type="radio"/> 5 |

---

## ABOUT

The RAND Corporation is a research organization that develops solutions to public policy challenges to help make communities throughout the world safer and more secure, healthier and more prosperous. RAND is nonprofit, nonpartisan, and committed to the public interest.

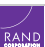

RAND® is a registered trademark. Copyright © 1994-2019 RAND Corporation.

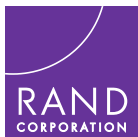

# 36-Item Short Form Survey (SF-36) Scoring Instructions

## Introduction

The RAND 36-Item Health Survey (Version 1.0) taps eight health concepts: physical functioning, bodily pain, role limitations due to physical health problems, role limitations due to personal or emotional problems, emotional well-being, social functioning, energy/fatigue, and general health perceptions. It also includes a single item that provides an indication of perceived change in health. These 36 items, presented here, are identical to the MOS SF-36 described in Ware and Sherbourne (1992). They were adapted from longer instruments completed by patients participating in the Medical Outcomes Study (MOS), an observational study of variations in physician practice styles and patient outcomes in different systems of health care delivery (Hays & Shapiro, 1992; Stewart, Sherbourne, Hays, et al., 1992).

## Scoring Rules for the RAND 36-Item Health Survey (Version 1.0)

We recommend that responses be scored as described below. A somewhat different scoring procedure for the MOS SF-36 has been distributed by the International Resource Center for Health Care Assessment (located in Boston, MA). Because the scoring method described here (a simpler and more straightforward procedure) differs from that of the MOS SF-36, persons using this scoring method should refer to the instrument as RAND 36-Item Health Survey 1.0.

Scoring the RAND 36-Item Health Survey is a two-step process. First, precoded numeric values are recoded per the scoring key given in Table 1. Note that all items are scored so that a high score defines a more favorable health state. In addition, each item is scored on a 0 to 100 range so that the lowest and highest possible scores are 0 and 100, respectively. Scores represent the percentage of total possible score achieved. In step 2, items in the same scale are averaged together to create the 8 scale scores. Table 2 lists the items averaged together to create each scale. Items that are left blank (missing data) are not taken into account when calculating the scale scores. Hence, scale scores represent the average for all items in the scale that the respondent answered.

**Example:** Items 20 and 32 are used to score the measure of social functioning. Each of the two items has 5 response choices. However, a high score (response choice 5) on item 20 indicates the presence of limitations in social functioning, while a high score (response choice 5) on item 32 indicates the absence of limitations in social functioning. To score both items in the same direction, Table 1 shows that responses 1 through 5 for item 20 should be recoded to values of 100, 75, 50, 25, and 0, respectively. Responses 1 through 5 for item 32 should be recoded to values of 0, 25, 50, 75, and 100, respectively. Table 2 shows that these two recoded items should be averaged together to form the social functioning scale. If the respondent is missing one of the two items, the person's score will be equal to that of the non-missing item.

Table 3 presents information on the reliability, central tendency, and variability of the scales scored using this method.

## References

1. Ware, J.E., Jr., & Sherbourne, C.D. "The MOS 36-Item Short-Form Health Survey (SF-36): I. Conceptual Framework and Item Selection," *Medical Care*, 30:473-483, 1992.
2. Hays, R.D., & Shapiro, M.F. "An Overview of Generic Health-Related Quality of Life Measures for HIV Research," *Quality of Life Research*. 1:91-97, 1992.
3. Steward, A.L., Sherbourne, C., Hayes, R.D., et al. "Summary and Discussion of MOS Measures," in A.L. Stewart & J.E. Ware (eds.), *Measuring Functioning and Well-Being: The Medical Outcome Study Approach* (pp. 345-371). Durham, NC: Duke University Press, 1992.

## Table 1

### Step 1: Recoding Items

| Item numbers                    | Change original response category * | To recoded value of: |
|---------------------------------|-------------------------------------|----------------------|
| 1, 2, 20, 22, 34, 36            | 1 →                                 | 100                  |
|                                 | 2 →                                 | 75                   |
|                                 | 3 →                                 | 50                   |
|                                 | 4 →                                 | 25                   |
|                                 | 5 →                                 | 0                    |
| 3, 4, 5, 6, 7, 8, 9, 10, 11, 12 | 1 →                                 | 0                    |
|                                 | 2 →                                 | 50                   |
|                                 | 3 →                                 | 100                  |
| 13, 14, 15, 16, 17, 18, 19      | 1 →                                 | 0                    |
|                                 | 2 →                                 | 100                  |
| 21, 23, 26, 27, 30              | 1 →                                 | 100                  |
|                                 | 2 →                                 | 80                   |
|                                 | 3 →                                 | 60                   |
|                                 | 4 →                                 | 40                   |
|                                 | 5 →                                 | 20                   |
|                                 | 6 →                                 | 0                    |
| 24, 25, 28, 29, 31              | 1 →                                 | 0                    |
|                                 | 2 →                                 | 20                   |
|                                 | 3 →                                 | 40                   |
|                                 | 4 →                                 | 60                   |
|                                 | 5 →                                 | 80                   |
|                                 | 6 →                                 | 100                  |
| 32, 33, 35                      | 1 →                                 | 0                    |
|                                 | 2 →                                 | 25                   |
|                                 | 3 →                                 | 50                   |
|                                 | 4 →                                 | 75                   |
|                                 | 5 →                                 | 100                  |

\* Precoded response choices as printed in the questionnaire.

## Table 2

### Step 2: Averaging Items to Form Scales



| Scale                                      | Number of items | After recoding per Table 1, average the following items |
|--------------------------------------------|-----------------|---------------------------------------------------------|
| Physical functioning                       | 10              | 3 4 5 6 7 8 9 10 11 12                                  |
| Role limitations due to physical health    | 4               | 13 14 15 16                                             |
| Role limitations due to emotional problems | 3               | 17 18 19                                                |
| Energy/fatigue                             | 4               | 23 27 29 31                                             |
| Emotional well-being                       | 5               | 24 25 26 28 30                                          |
| Social functioning                         | 2               | 20 32                                                   |
| Pain                                       | 2               | 21 22                                                   |
| General health                             | 5               | 1 33 34 35 36                                           |

## Table 3

### Reliability, Central Tendency, and Variability of Scales in the Medical Outcomes Study

| Scale                      | Items | Alpha | Mean  | SD    |
|----------------------------|-------|-------|-------|-------|
| Physical functioning       | 10    | 0.93  | 70.61 | 27.42 |
| Role functioning/physical  | 4     | 0.84  | 52.97 | 40.78 |
| Role functioning/emotional | 3     | 0.83  | 65.78 | 40.71 |
| Energy/fatigue             | 4     | 0.86  | 52.15 | 22.39 |
| Emotional well-being       | 5     | 0.90  | 70.38 | 21.97 |
| Social functioning         | 2     | 0.85  | 78.77 | 25.43 |
| Pain                       | 2     | 0.78  | 70.77 | 25.46 |
| General health             | 5     | 0.78  | 56.99 | 21.11 |
| Health change              | 1     | —     | 59.14 | 23.12 |

*Note: Data is from baseline of the Medical Outcomes Study (N=2471), except for “Health change,” which was obtained one year later.*

#### ABOUT

The RAND Corporation is a research organization that develops solutions to public policy challenges to help make communities throughout the world safer and more secure, healthier and more prosperous. RAND is nonprofit, nonpartisan, and committed to

the public interest.

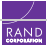

---

RAND® is a registered trademark. Copyright © 1994-2019 RAND Corporation.
